# Supplementary material for: Socioeconomic inequalities in mortality, morbidity and diabetes management for adults with type 1 diabetes: A systematic review
Source: PLoS One. 2017 May 10;12(5):e0177210. doi: 10.1371/journal.pone.0177210 (PMC5425027; doi:10.1371/journal.pone.0177210)
Supplement: S2 Table — (XLSX) [file pone.0177210.s002.xlsx]

## Sheet: Sheet1
S2 File Table A - Quality Assessment form
Study Appraisal based on Critical Appraisal Skills Programme (CASP)	Anderson (2014)	Butalia (2013)	Chaturvedi (1996)	Forssas (2003)	Forssas (2010)	Forssas (2012)	Gnavi (2004)	Harris (1993)	Hepburn (1994)	Johansen (1986)	Karter (2000)	Leese (2003)	Lievre (2005)	Lloyd (1993)	Matsushima (1996)	Muhlhauser (1998) (Hypoglycaemia)	Muhlhauser (1998) (Quality of care)	Muhlhauser (2000)	Nadas (2009)	Osan (2016)	Pederson-Bjergaard (2004)	Perros (1998)	Rawshani (2015)	Robinson (1984)	Robinson (1998)	Rossing (1996)	Sastre (2012)	Secrest (2011) (Mortality)	Secrest (2011) (Morbidity)	Simmons (2013)	Unwin (1996)	Weinstock (2013)	Zgibor (2000)
1. Did the study address a clearly focused issue?	Y	Y	Y	Y	Y	Y	Y	Y	Y	Y	Y	Y	Y	Y	Y	Y	Y	Y	Y	Y	Y	Y	Y	Y	Y	Y	Y	Y	Y	Y	Y	Y	Y
2. Was an appropriate method used to answer the question?	Y	Y	Y	Y	Y	Y	Y	Y	Y	Y	Y	Y	Y	Y	Y	Y	Y	Y	Y	U	Y	Y	Y	Y	Y	Y	Y	Y	Y	Y	Y	Y	Y
3. Were inclusion/exclusion criteria reported?	I-Y, E-N	I-Y, E-Y	I-Y, E-Y	I-Y, E-Y	I-Y, E-Y	I-Y, E-Y	I-Y, E-Y	I-Y,E-Y	I-Y, E-N	I-Y, E-Y	I-Y, E-Y	I-Y,E-Y	I-Y, E-N	I-Y, E-N	I-Y,E-Y	I-Y, E-N	I-Y, E-N	I-Y, E-Y	I-Y, E-N	Y	I-Y, E-Y	I-N, E-Y	Y	I-Y, E-N	I-Y, E-N	I-Y, E-Y	Y	I-Y, E-Y	I-Y, E-Y	Y	I-E,E-N	I-Y, E-N	I-Y, E-N
4. Were participants recruited in an acceptable way e.g. to minimise selection bias?	Y	U	Y	Y	Y	Y	Y	Y	Y	U	U	Y	U	Y	Y	Y	Y	Y	Y	U	Y	Y	Y	Y	Y	Y	U	U	U	Y	Y	Y	Y
5. Were accurate measures used (to minimise bias?):
5.1 To identify type 1 diabetes?	Y	Y	Y	Y	Y	Y	Y	Y	Y	Y	Y	Y	Y	Y	Y	Y	Y	Y	Y	U	Y	Y	Y	Y	Y	Y	Y	Y	Y	Y	Y	Y	Y
5.2 To measure outcomes?	Y	Y	Y	Y	Y	Y	Y	Y	Y	Y	Y	Y	Y	Y	Y	Y	Y	Y	Y	Y	Y	Y	Y	Y	Y	Y	Y	Y	Y	Y	Y	Y	Y
5.3 Were there any issues with potential bias?	Y	Y	N	N	N	N	Y	Y	U	Y	Y	N	Y	N	N	N	Y	U	N	U	Y	U	N	U	U	N	Y	U	U	N	U	Y	Y
6. Did the study take account of the confounding factors in the design and analysis?	Y	Y	Y	Y	Y	Y	Y	N	U	N	Y	N	Y	Y	Y	Y	Y	Y	N	N	Y	N	Y	N	Y	Y	Y	Y	Y	N	N	Y	Y
7. Was the follow up of subjects complete enough?	N/A	N/A	N/A	Y	Y	Y	Y	N/A	N/A	N/A	N/A	Y	N/A	N/A	N/A	Y	N/A	Y	N/A	N/A	N/A	N/A	Y	N/A	Y	Y	N/A	Y	Y	N/A	N/A	N/A	N/A
8. Was the follow up long enough?	N/A	N/A	N/A	Y	Y	Y	Y	N/A	N/A	N/A	N/A	Y	N/A	N/A	N/A	Y	N/A	Y	N/A	N/A	N/A	N/A	Y	N/A	Y	Y	N/A	Y	Y	N/A	N/A	N/A	N/A
9. Are the results reported adequately?	Y	Y	Y	Y	Y	Y	Y	Y	Y	Y	Y	N	Y	Y	Y	Y	Y	Y	Y	U	Y	Y	Y	Y	Y	Y	Y	Y	Y	N/A	Y	Y	Y
10. Can the results be believed?	Y	U	Y	Y	Y	Y	U	U	Y	Y	Y	Y	Y	Y	Y	Y	Y	Y	Y	U	Y	Y	Y	Y	Y	Y	Y	Y	Y	Y	U	Y	Y
11. Can the results be applied to the local population?	U	U	Y	Y	Y	Y	U	U	U	U	U	Y	U	U	U	Y	Y	Y	U	U	U	U	Y	Y	Y	Y	U	U	U	U	U	U	U
12. Do the results of this study fit with other evidence available?	N/A	U	Y	Y	Y	Y	Y	U	U	Y	Y	Y	Y	Y	Y	Y	Y	Y	Y	U	Y	Y	Y	Y	Y	Y	Y	Y	Y	Y	U	Y	Y
Key: Y = yes, N = no, U = unclear, N/A = not applicable, I = included, E = excluded
